# Supplementary material
Source: PubMed Central journal article supplement (PMC3419459)
Supplement: ct300420f_si_001.pdf [file ct300420f_si_001.pdf]

# Supporting Information for “Non-Empirically Tuned Range-Separated DFT Accurately Predicts Both Fundamental Excitation Gaps in DNA and RNA Nucleobases”

*Michael E. Foster and Bryan M. Wong\**

Materials Chemistry Department, Sandia National Laboratories, Livermore, California 94551, USA

\*Corresponding author. E-mail: [bmwong@sandia.gov](mailto:bmwong@sandia.gov). Homepage: <http://alum.mit.edu/www/usagi>

## Contents

- p. S2, Table S1.** LC-BLYP/aug-cc-pVTZ optimal  $\mu$  values for the different DNA/RNA nucleobases
- p. S3, Table S2.** HOMO-1, HOMO, and LUMO energy levels (in eV) for the DNA/RNA nucleobases calculated at different levels of theory
- p. S4,** Reference Cartesian coordinates for guanine
- p. S5,** Reference Cartesian coordinates for adenine
- p. S6,** Reference Cartesian coordinates for cytosine
- p. S7,** Reference Cartesian coordinates for thymine
- p. S8,** Reference Cartesian coordinates for uracil

| Nucleobase | Optimal $\mu$ (Bohr <sup>-1</sup> ) |
|------------|-------------------------------------|
| Guanine    | 0.2692                              |
| Adenine    | 0.2699                              |
| Cytosine   | 0.2800                              |
| Thymine    | 0.2735                              |
| Uracil     | 0.2923                              |

**Table S1.** LC-BLYP/aug-cc-pVTZ optimal  $\mu$  values for the different DNA/RNA nucleobases

|                     | LDA-KS <sup>†</sup> | B3LYP / aug-cc-<br>pVTZ | LC-BLYP / aug-cc-<br>pVTZ | GW <sup>†</sup> | CASPT2 <sup>†,‡</sup> | Experiment <sup>†</sup> |
|---------------------|---------------------|-------------------------|---------------------------|-----------------|-----------------------|-------------------------|
| Guanine             |                     |                         |                           |                 |                       |                         |
| HOMO-1              | 6.34                | 7.27                    | 9.40                      | 9.82            | 9.56                  | 9.9                     |
| HOMO                | 5.69                | 5.91                    | 7.91                      | 7.81            | 8.09                  | 8.0 - 8.3               |
| LUMO                | 1.8                 | 0.93                    | -0.09                     | -1.58           | -1.14                 |                         |
| Fundamental gap     | 3.89                | 4.98                    | 8.00                      | 9.39            | 9.23                  |                         |
| Adenine             |                     |                         |                           |                 |                       |                         |
| HOMO-1              | 6.28                | 7.13                    | 9.24                      | 9.47            | 9.05                  | 9.45                    |
| HOMO                | 6.02                | 6.25                    | 8.28                      | 8.22            | 8.37                  | 8.3 - 8.5, 8.47         |
| LUMO                | 2.22                | 1.02                    | -0.37                     | -1.14           | -0.91                 | -0.56 to -0.45          |
| Fundamental gap     | 3.80                | 5.23                    | 8.65                      | 9.36            | 9.28                  |                         |
| Cytosine            |                     |                         |                           |                 |                       |                         |
| HOMO-1              | 6.172               | 7.11                    | 9.33                      | 9.52            | 9.42                  | 9.45, 9.55              |
| HOMO                | 6.167               | 6.60                    | 8.74                      | 8.73            | 8.73                  | 8.8 - 9.0, 8.89         |
| LUMO                | 2.57                | 1.40                    | -0.20                     | -0.91           | -0.69                 | -0.55 to -0.32          |
| Fundamental gap     | 3.60                | 5.20                    | 8.94                      | 9.64            | 9.42                  |                         |
| Thymine             |                     |                         |                           |                 |                       |                         |
| HOMO-1              | 6.68                | 7.62                    | 9.76                      | 10.41           | 9.81                  | 9.95 - 10.05, 10.14     |
| HOMO                | 6.54                | 6.91                    | 8.95                      | 9.05            | 9.07                  | 9.0 - 9.2, 9.19         |
| LUMO                | 2.83                | 1.65                    | -0.21                     | -0.67           | -0.6                  | -0.53 to -0.29          |
| Fundamental gap     | 3.71                | 5.26                    | 9.16                      | 9.72            | 9.67                  |                         |
| Uracil              |                     |                         |                           |                 |                       |                         |
| HOMO-1              | 6.88                | 7.68                    | 9.99                      | 10.54           | 9.83                  | 10.02 - 10.13           |
| HOMO                | 6.72                | 7.27                    | 9.47                      | 9.47            | 9.42                  | 9.4 - 9.6               |
| LUMO                | 3.01                | 1.81                    | -0.16                     | -0.64           | -0.61                 | -0.30 to -0.22          |
| Fundamental gap     | 3.71                | 5.46                    | 9.63                      | 10.11           | 10.03                 |                         |
| MAE HOMO-1          | 3.06 (3.48)         | 2.17 (2.59)             | 0.01 (0.41)               | 0.42            |                       |                         |
| MAE HOMO            | 2.51 (2.43)         | 2.15 (2.07)             | 0.07 (0.01)               | 0.08            |                       |                         |
| MAE LUMO            | 3.28 (3.47)         | 2.15 (2.35)             | 0.58 (0.78)               | 0.20            |                       |                         |
| MAE Fundamental gap | 5.78 (5.90)         | 4.30 (4.42)             | 0.65 (0.77)               | 0.12            |                       |                         |

**Table S2.** HOMO-1, HOMO, and LUMO energy levels (in eV) for the DNA/RNA nucleobases calculated at different levels of theory (note: the negative of the orbital energies are reported). The fundamental gap is determined by the difference between the HOMO and LUMO orbital energies. The MAE (mean absolute error) values are with respect to the CASPT2 values; the values in parentheses are with respect to the GW values. <sup>†</sup>Values were obtained from Ref. 1. <sup>‡</sup>The reported CASPT2 HOMO/LUMO energies are actually the vertical ionization energies and electron affinities, respectively (see main text).

Reference Cartesian coordinates (in Å) for **guanine**

|   |             |             |             |
|---|-------------|-------------|-------------|
| N | 0.95103344  | 0.74588413  | 0.00000144  |
| C | -1.49642563 | -0.09935178 | 0.00002235  |
| C | -1.33220817 | 1.30207573  | 0.00005918  |
| C | 0.66682489  | -0.59425707 | -0.00001277 |
| C | 0.01635877  | 1.82442902  | 0.00002553  |
| N | -0.56066108 | -1.07640186 | -0.00000210 |
| N | 1.71481265  | -1.46581979 | -0.00006470 |
| H | 1.48440682  | -2.46212880 | -0.00002519 |
| H | 2.68872896  | -1.16135180 | 0.00005104  |
| O | 0.44367551  | 2.97649997  | 0.00000553  |
| N | -2.54986302 | 1.94040224  | 0.00006419  |
| C | -3.43506077 | 0.96689703  | 0.00002738  |
| H | -4.53758831 | 1.09743659  | 0.00002927  |
| N | -2.85224920 | -0.28793673 | -0.00000073 |
| H | -3.31793982 | -1.20257220 | -0.00003749 |
| H | 1.92439341  | 1.08388113  | -0.00002583 |

Reference Cartesian coordinates (in Å) for **adenine**

|   |             |             |             |
|---|-------------|-------------|-------------|
| N | 1.00978880  | 0.74572335  | -0.00001530 |
| C | -1.51369985 | -0.16385117 | 0.00000078  |
| C | -1.32432583 | 1.23295247  | 0.00003944  |
| C | 0.66277242  | -0.55578813 | -0.00003259 |
| C | 0.02778638  | 1.66502787  | 0.00001047  |
| N | -0.56155283 | -1.10622262 | -0.00003458 |
| H | 1.51767039  | -1.27471790 | -0.00004805 |
| N | 0.34848568  | 2.97812545  | -0.00001164 |
| H | 1.33873147  | 3.23936680  | -0.00000435 |
| H | -0.39663209 | 3.68061172  | 0.00003808  |
| N | -2.52110889 | 1.91313209  | 0.00005519  |
| C | -3.42770742 | 0.95225575  | 0.00002734  |
| H | -4.52692639 | 1.11164669  | 0.00002556  |
| N | -2.88257926 | -0.31447295 | -0.00000432 |
| H | -3.38561856 | -1.20919409 | -0.00005145 |

Reference Cartesian coordinates (in Å) for **cytosine**

|   |             |             |             |
|---|-------------|-------------|-------------|
| N | 1.14904057  | 0.63518420  | -0.00001193 |
| C | -1.34371073 | -0.61250622 | 0.00001462  |
| C | -1.29668275 | 0.76105602  | 0.00004891  |
| C | 1.10204936  | -0.73362929 | -0.00001209 |
| C | 0.02516335  | 1.33831302  | 0.00001304  |
| N | -0.19399492 | -1.32366089 | -0.00002833 |
| H | -2.29935893 | -1.18252596 | 0.00002318  |
| H | -2.22055810 | 1.37511297  | 0.00008373  |
| O | 2.07616821  | -1.48560443 | 0.00000314  |
| N | 0.15733385  | 2.68981983  | 0.00000293  |
| H | -0.64893280 | 3.31620742  | 0.00000038  |
| H | 1.11285301  | 3.06166983  | -0.00003074 |
| H | -0.18520792 | -2.35219256 | -0.00003407 |

Reference Cartesian coordinates (in Å) for **thymine**

|   |             |             |             |
|---|-------------|-------------|-------------|
| N | 1.14690489  | 0.58634304  | -0.00071387 |
| C | -1.26069863 | -0.63223611 | 0.02350754  |
| C | -1.26694288 | 0.73620614  | 0.04078617  |
| C | 1.17720310  | -0.79915753 | -0.00059683 |
| C | 0.02554195  | 1.42878862  | 0.01299201  |
| N | -0.09540930 | -1.35981377 | -0.00151990 |
| H | 2.06801258  | 1.05028816  | -0.01001415 |
| H | -2.20509683 | -1.22254263 | 0.03068533  |
| C | -2.49142777 | 1.58328610  | 0.09410188  |
| H | -3.42395829 | 0.96780564  | 0.05051049  |
| H | -2.50067321 | 2.19422848  | 1.03437753  |
| H | -2.49235540 | 2.32136907  | -0.74816232 |
| O | 2.20568578  | -1.47198873 | -0.00180910 |
| O | 0.15320249  | 2.65511204  | 0.00150994  |
| H | -0.10220997 | -2.38662822 | -0.01132262 |

Reference Cartesian coordinates (in Å) for **uracil**

|   |             |             |             |
|---|-------------|-------------|-------------|
| N | 1.14697849  | 0.58666204  | -0.00319763 |
| C | -1.24841389 | -0.65900001 | 0.01722627  |
| C | -1.25016037 | 0.70766060  | 0.01500134  |
| C | 1.18738494  | -0.79659357 | 0.00039035  |
| C | 0.01719519  | 1.42946040  | 0.00310714  |
| N | -0.08115913 | -1.37461681 | 0.00593386  |
| H | 2.06175024  | 1.06249266  | -0.00986687 |
| H | -2.18662482 | -1.25766722 | 0.02955514  |
| H | -2.18805773 | 1.29756107  | 0.02544546  |
| O | 2.21427357  | -1.46996815 | -0.00050242 |
| O | 0.15220447  | 2.65263034  | -0.00007986 |
| H | -0.06964598 | -2.40144502 | 0.01504209  |
